# Supplementary material
Source: ML conference proceedings conference paper supplement (https://proceedings.neurips.cc/paper_files/paper/2018/hash/ce6c92303f38d297e263c7180f03d402-Abstract.html)
Supplement: Supplementary file [file ce6c92303f38d297e263c7180f03d402-Supplemental.zip]

# Supplementary Figures for PG-TS: Improved Thompson Sampling for Logistic Contextual Bandits

## The effect of the burn-in step $M$ in Gaussian Simulations

PG-TS relies on approximating an integral using a double sampling of an appropriate Markov Chain. Hence, the burn-in Gibbs step  $M$  affects the convergence behavior of PG-TS with respect to the cumulative regret (Fig. S1). Due to diminishing returns illustrated in our empirical studies, we set  $M$  to 100 throughout the paper. In practice, setting  $M$  to a large value allows for appropriate mixing and has substantial impact on performance, as seen in the news recommendation application.

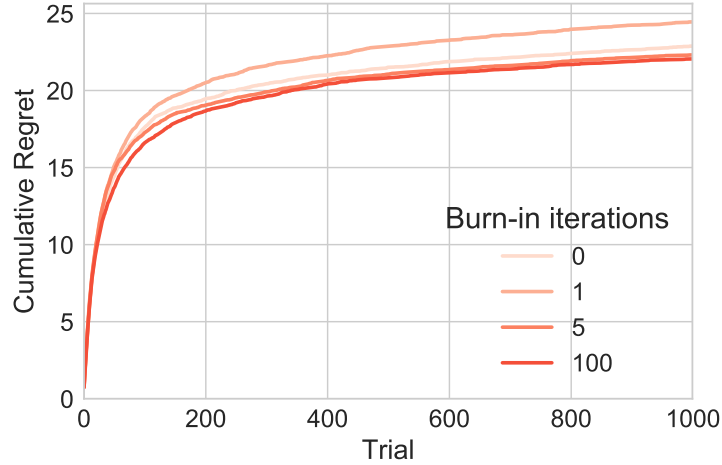

Figure S1: Comparison of the average cumulative regret of the PG-TS algorithm with varying number of burn-in iterations on the simulated data set with Gaussian  $\theta^*$  over 100 runs with 1,000 trials. The lower the regret, the better the performance.

## Variance of the Cumulative Regret Performance

The methods considered show very diverse behavior across experiments even in the simple Gaussian simulation case. In particular, while both PG-TS and PG-TS-stream converge across experiments, Laplace-TS shows high variability and significantly higher cumulative regret across the same trials.

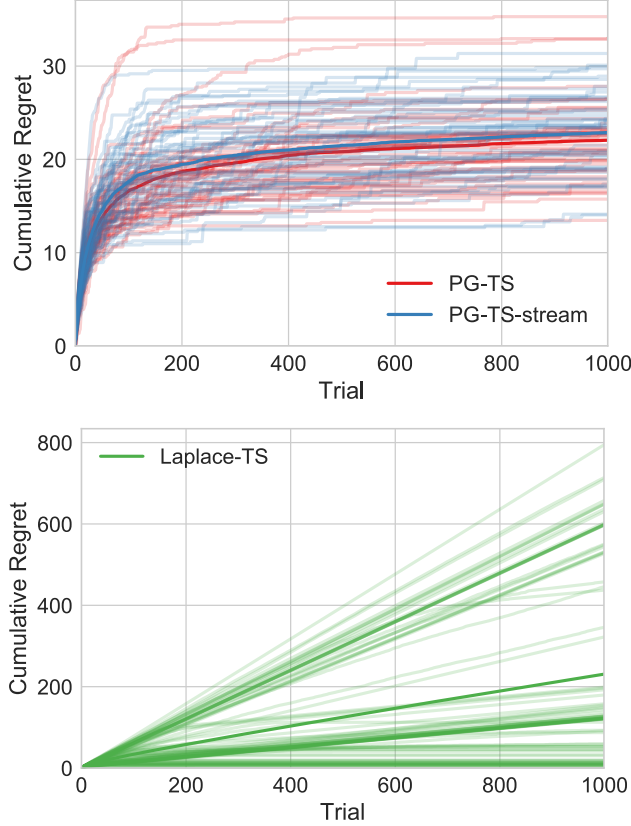

Figure S2: Trace plots of cumulative regret for PG-TS and PG-TS-stream (Top), and Laplace-TS (Bottom) on the simulated data set with Gaussian  $\theta^*$  over 100 runs with 1,000 trials.

Furthermore, Laplace-TS is sensitive to multimodality. We found that the misspecified model does not prevent the PG-TS algorithms from consistently finding the correct arm, while Laplace-TS exhibits poor average behavior (Fig. S3). For our simulations, we do not show comparison to GLM-UCB as previous studies address the superiority of Laplace-TS [Chapelle and Li, 2011, Russo and Van Roy, 2014].

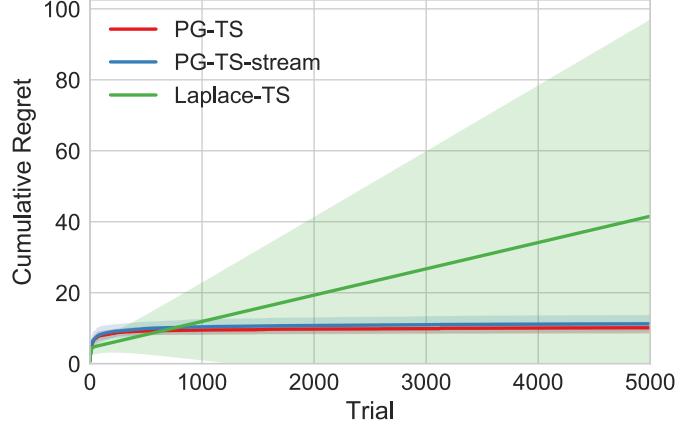

Figure S3: Comparison of the average cumulative regret of the PG-TS, PG-TS-stream, and the Laplace-TS algorithms on simulated data with mixed Gaussian  $\theta^*$  over 100 runs with 5,000 trials (standard deviation shaded). Laplace-TS performs better during earlier trials, yet struggles to settle on an optimal arm.

### Langevin Alternatives

We compared our method to Langevin-TS [Russo et al., 2017], and we found that PG-TS significantly outperforms Langevin-TS in our simulations (Fig. S5). We note that the Langevin implementation is very sensitive to learning rate, step size and numerous other initialization parameters, unlike PG-TS whose performance is consistent across our simulations.

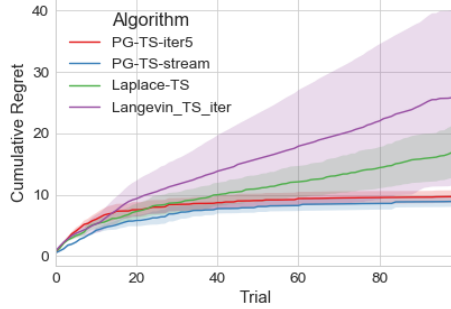

Figure S4: Comparison of the average cumulative regret of the PG-TS-iter, PG-TS-stream, and Laplace-TS algorithms and Langevin on the simulated data set with Gaussian  $\theta^*$  over 100 runs with 1,000 trials (standard deviation shown as shaded region)

We further note that PG-TS outperforms a variance reduced stochastic gradient Monte Carlo approach extension to Langevin-TS [Chatterji et al., 2018].

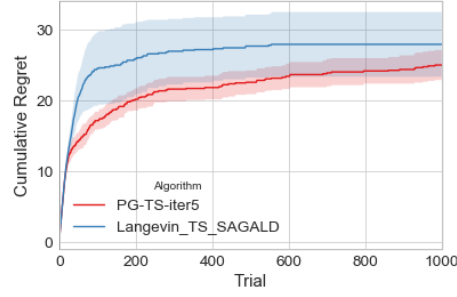

Figure S5: Comparison of the average cumulative regret of the PG-TS-iter, PG-TS-stream, and Laplace-TS algorithms and Langevin on the simulated data set with Gaussian  $\theta^*$  over 100 runs with 1,000 trials (standard deviation shown as shaded region)

## Exploration and Exploitation comparison across Gaussian simulations

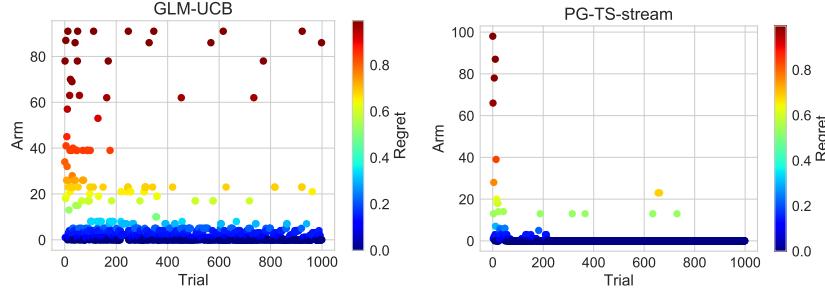

Figure S6: Comparison of the arm choices for the GLM-UCB (Left) and PG-TS-stream (Right) algorithms on the simulated data set with Gaussian  $\theta^*$  across 1,000 trials. The arms were sorted by expected reward in decreasing order, with arm 0 giving the highest reward, and arm 99 the lowest. The selected arms are colored according to the distance of their expected reward from the optimal reward (regret). GLM-UCB takes many trials to settle on the optimal arm, while both PG-TS algorithms explore successfully and settle on the optimal one. Recall that Laplace-TS gets stuck on a sub-optimal arm.

## Pseudocode for the algorithms mentioned

---

### Algorithm 1 Generic Contextual Bandit Algorithm

---

**Initialize**  $\mathcal{D}_0 = \emptyset$   
**for**  $t = 1, 2, \dots$  **do**  
    Observe  $K_t$  arms  $\mathcal{A}_t$   
    Receive context  $\mathbf{x}_{t,a} \in \mathbb{R}^d$   
    Select  $a_t$  given  $\mathbf{x}_{t,a}, \mathcal{D}_{t-1}$   
    Observe reward  $r_{t,a_t}$   
    Update  $\mathcal{D}_t = \mathcal{D}_{t-1} \cup \{\mathbf{x}_{t,a_t}, a_t, r_t\}$   
**end for**

---



---

### Algorithm 2 Laplace-TS [Chapelle and Li, 2011]

---

**Input:** Regularization parameter  $\lambda = 1$   
 $m_i = 0, q_i = \lambda$ , for  $i = 1, 2, \dots, d$   
**for**  $t = 1$  **to**  $T$  **do**  
    Receive context  $\mathbf{x}_{t,a}$   
     $\mathbf{Q} = \text{diag}(q_1^{-1}, q_2^{-1}, \dots, q_d^{-1})$   
    Draw  $\boldsymbol{\theta}_t \sim \text{MVN}(\mathbf{m}, \mathbf{Q})$   
    Select  $a_t = \arg \max_a \mu(\mathbf{x}_{t,a}^\top \boldsymbol{\theta}_t)$   
    Receive reward  $r_t$   
     $y_t = 2r_t - 1$   
     $\mathbf{w} = \arg \min_{\mathbf{w}} \frac{1}{2} \sum_{i=1}^d q_i (w_i - m_i)^2 - \log(\mu(y_t \mathbf{x}_{t,a_t}^\top \mathbf{w}))$   
     $\mathbf{m} = \mathbf{w}$   
     $p = \mu(\mathbf{x}_{t,a_t}^\top \mathbf{w})$   
     $\mathbf{q} = \mathbf{q} + p(1-p) \mathbf{x}_{t,a_t}^2$   
**end for**

---



---

### Algorithm 3 GLM-UCB [Filippi et al., 2010]

---

**Input:** Admissible parameter set  $\Theta$ , slowly increasing function  $\rho(t)$   
**for**  $t = 1, 2, \dots$  **do**  
    Receive context  $\mathbf{x}_{t,a}$   
     $\boldsymbol{\theta}_t = \arg \min_{\boldsymbol{\theta} \in \Theta} \left\| \sum_{i=1}^{t-1} (r_i - \mu(\mathbf{x}_{i,a_i}^\top \boldsymbol{\theta})) \mathbf{x}_{i,a_i} \right\|_{\mathbf{V}_t^{-1}}^2$   
    Select  $a_t = \arg \max_a \{x_{t,a}^\top \boldsymbol{\theta}_t + \rho(t) \|\mathbf{x}_{t,a}\|_{\mathbf{V}_t^{-1}}^2\}$   
    Receive reward  $r_t \in \{0, 1\}$   
     $\mathbf{V}_{t+1} = \sum_{i=1}^t \mathbf{x}_{i,a_i} \mathbf{x}_{i,a_i}^\top$   
**end for**

---

## References

- Olivier Chapelle and Lihong Li. An empirical evaluation of Thompson sampling. In *Advances in neural information processing systems*, pages 2249–2257, 2011.
- Niladri S Chatterji, Nicolas Flammarion, Yi-An Ma, Peter L Bartlett, and Michael I Jordan. On the theory of variance reduction for stochastic gradient monte carlo. *arXiv preprint arXiv:1802.05431*, 2018.
- Sarah Filippi, Olivier Cappe, Aurélien Garivier, and Csaba Szepesvári. Parametric bandits: The generalized linear case. In *Advances in Neural Information Processing Systems*, pages 586–594, 2010.
- Daniel Russo and Benjamin Van Roy. Learning to optimize via posterior sampling. *Mathematics of Operations Research*, 39(4):1221–1243, 2014.
- Daniel Russo, Benjamin Van Roy, Abbas Kazerouni, and Ian Osband. A Tutorial on Thompson Sampling. *arXiv preprint arXiv:1707.02038*, 2017.
